# Supplementary material
Source: publisher figshare collection journal article supplement (https://acs.figshare.com/ndownloader/files/4162735)
Supplement: Supplementary file 1 [file 4162735]

# Supporting Information

## Preparation of chitosan-coated polyethylene packaging films by DBD plasma treatment

*Siriporn Theapsak<sup>1</sup>, Anyarat Watthanaphanit<sup>1</sup>, and Ratana Rujiravanit<sup>\*1, 2</sup>*

<sup>1</sup>The Petroleum and Petrochemical College, Chulalongkorn University, Bangkok 10330,  
Thailand

<sup>2</sup>Center for Petroleum, Petrochemicals, and Advanced Materials, Chulalongkorn University,  
Bangkok 10330, Thailand

**\*CORRESPONDING AUTHOR**

Tel.: (662)2184132, Fax: (662)2154459, E-mail: [ratana.r@chula.ac.th](mailto:ratana.r@chula.ac.th)

Data for **Figure 5A**

Effect of number of washing cycle on amount of chitosan deposited on the PE films.

| Number of washing cycle | Amount of deposited chitosan ( $\mu\text{g}/\text{cm}^2$ ) |
|-------------------------|------------------------------------------------------------|
| 1                       | $245.825 \pm 3.077$                                        |
| 2                       | $194.158 \pm 2.307$                                        |
| 3                       | $115.768 \pm 3.288$                                        |
| 4                       | $115.298 \pm 3.077$                                        |

Data for **Figure 5B**

Comparison on the amounts of coated chitosan on the untreated and plasma-treated PE films immersed in different chitosan concentrations.

| Chitosan concentration<br>(g/100 mL) | Amount of coated chitosan |                     |
|--------------------------------------|---------------------------|---------------------|
|                                      | Untreated film            | Plasma-treated film |
| 0.10                                 | $0.00 \pm 0.00$           | $3.574 \pm 1.273$   |
| 0.25                                 | $0.00 \pm 0.00$           | $5.044 \pm 0.636$   |
| 0.50                                 | $0.00 \pm 0.00$           | $8.351 \pm 0.636$   |
| 0.75                                 | $0.00 \pm 0.00$           | $17.531 \pm 1.279$  |
| 1.00                                 | $0.00 \pm 0.00$           | $32.340 \pm 1.151$  |
| 2.00                                 | $0.00 \pm 0.00$           | $115.768 \pm 1.644$ |

Data for **Figure 6B**

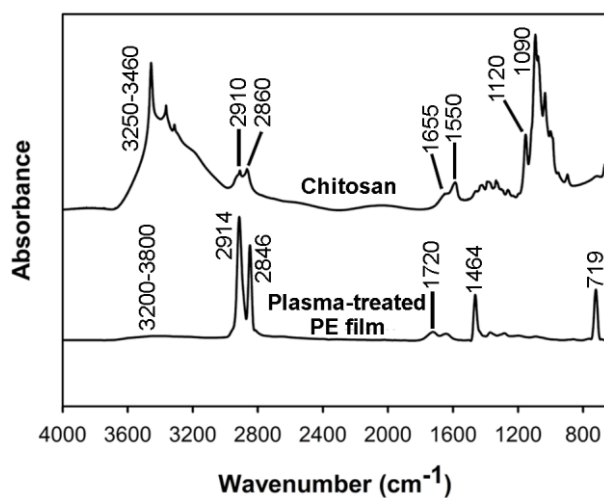

ATR-FTIR spectra of the neat chitosan and the plasma-treated PE film.

Assignment of FTIR characteristic peaks for chitosan.

| Wavenumber (cm <sup>-1</sup> ) | Assignment                                        |
|--------------------------------|---------------------------------------------------|
| 3250–3460                      | O–H and N–H stretching                            |
| 2910                           | CH <sub>2</sub> asymmetric stretching             |
| 2860                           | CH <sub>2</sub> symmetric stretching              |
| 1655                           | Amide I                                           |
| 1550                           | N–H bending from amine and amide II               |
| 1120                           | C–O–C antisymmetric stretching and C–N stretching |
| 1090                           | Skeleton vibration of C–O stretching              |

Assignment of FTIR characteristic peaks for plasma-treated PE film.

| Wavenumber (cm <sup>-1</sup> ) | Assignment                            |
|--------------------------------|---------------------------------------|
| 3200–3800                      | O–H stretching                        |
| 2914                           | CH <sub>2</sub> asymmetric stretching |
| 2846                           | CH <sub>2</sub> symmetric stretching  |
| 1720                           | C=O stretching                        |
| 1465                           | CH <sub>2</sub> bending               |
| 719                            | CH <sub>2</sub> rocking               |
